# Supplementary material for: A robust and low-cost strategy to prepare Cu2ZnSnS4 precursor solution and its application in Cu2ZnSn(S,Se)4 solar cells
Source: Royal Society of Chemistry journal article supplement (doi:10.1039/c4ra12090f), 2014-12-04
Supplement: c4ra12090f1.pdf [file c4ra12090f1.pdf]

**Electronic supplementary information**

**A Robust and Low-Cost Strategy to Prepare  $\text{Cu}_2\text{ZnSnS}_4$   
Precursor Solution and Its Application in  $\text{Cu}_2\text{ZnSn}(\text{S,Se})_4$  Solar  
Cells**

Qingwen Tian,<sup>a</sup> Yong Cui,<sup>b</sup> Gang Wang,<sup>a\*</sup> and Daocheng Pan<sup>a\*</sup>

*a: State Key Laboratory of Rare Earth Resource Utilization, Changchun Institute of Applied  
Chemistry, Chinese Academy of Sciences, 5625 Renmin Street, Changchun, Jilin, 130022, China*

*b: Shenyang R&D Center Laboratory for Material Science, Institute of Metal Research, Chinese  
Academy of Sciences, Wenhua Road 72, Shenyang, 110016, China*

E-mail: [wsu@ciac.ac.cn](mailto:wsu@ciac.ac.cn) and [pan@ciac.ac.cn](mailto:pan@ciac.ac.cn).

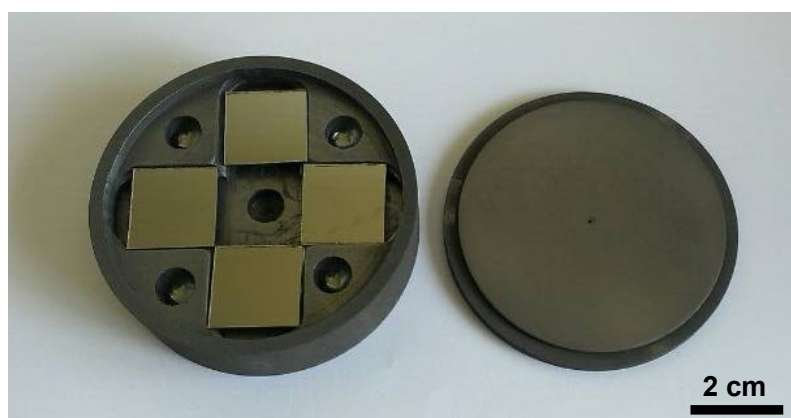

**Figure S1.** A digital photograph of graphite box.

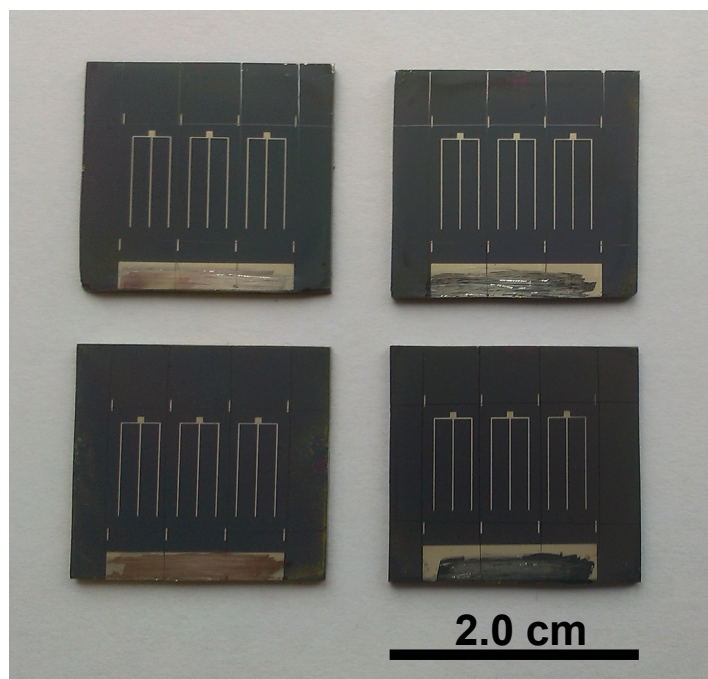

Figure S2. A digital photograph of CZTSSe solar cells.

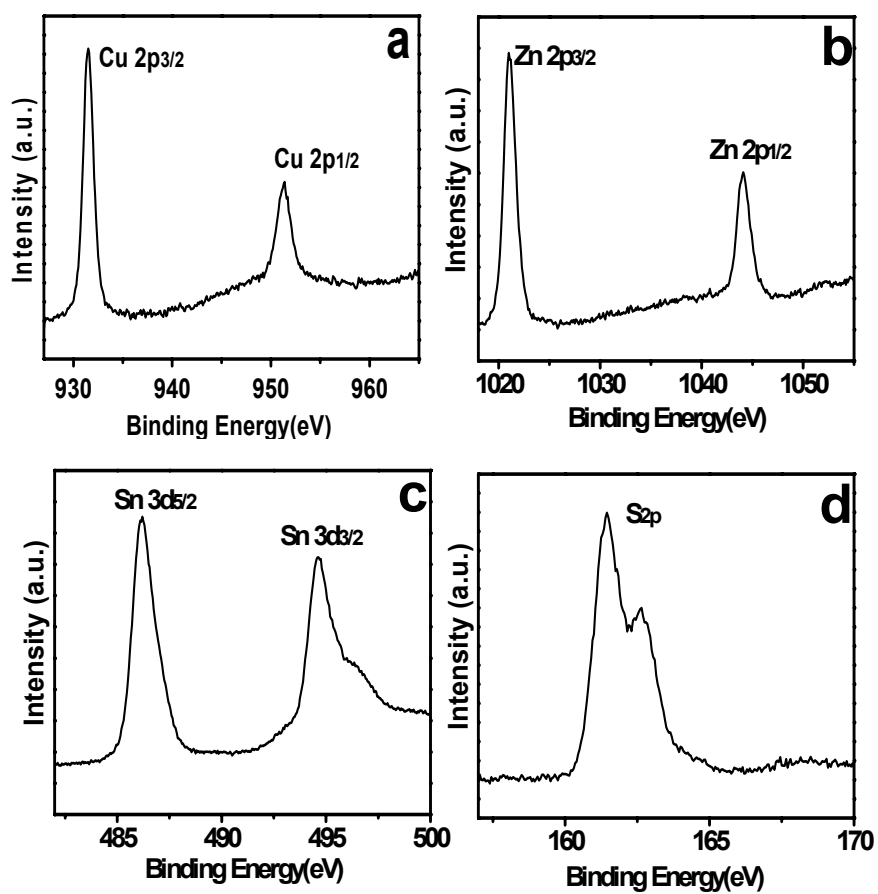

Figure S3. XPS spectra of the as-fabricated CZTS thin film.

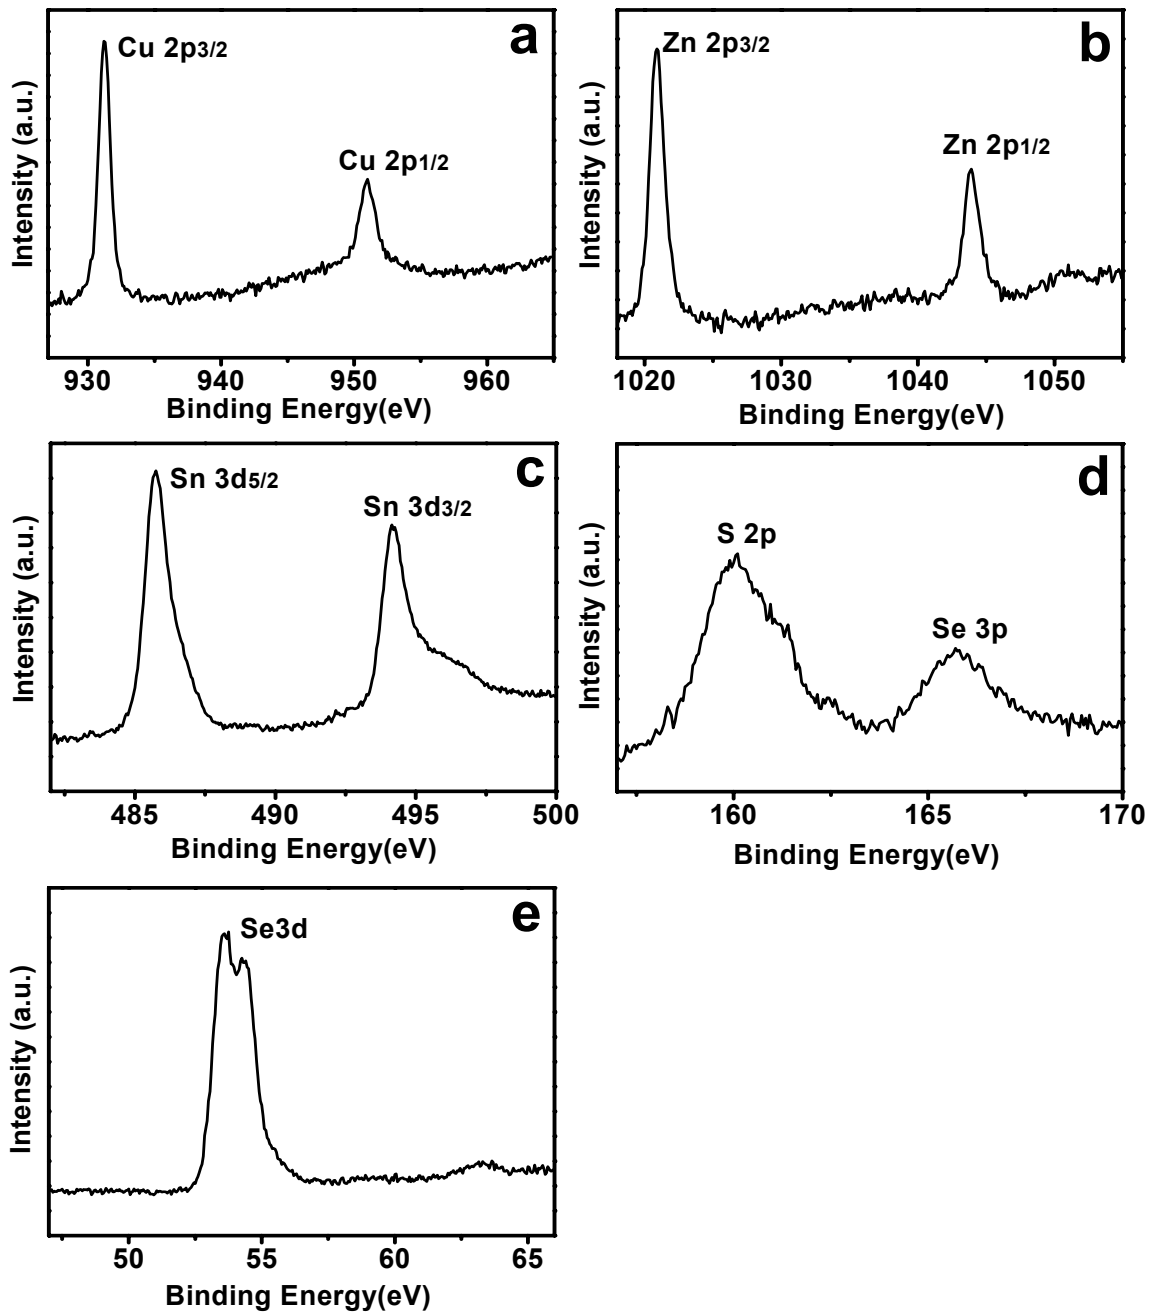

Figure S4. XPS spectra of the selenized CZTSSe thin film.

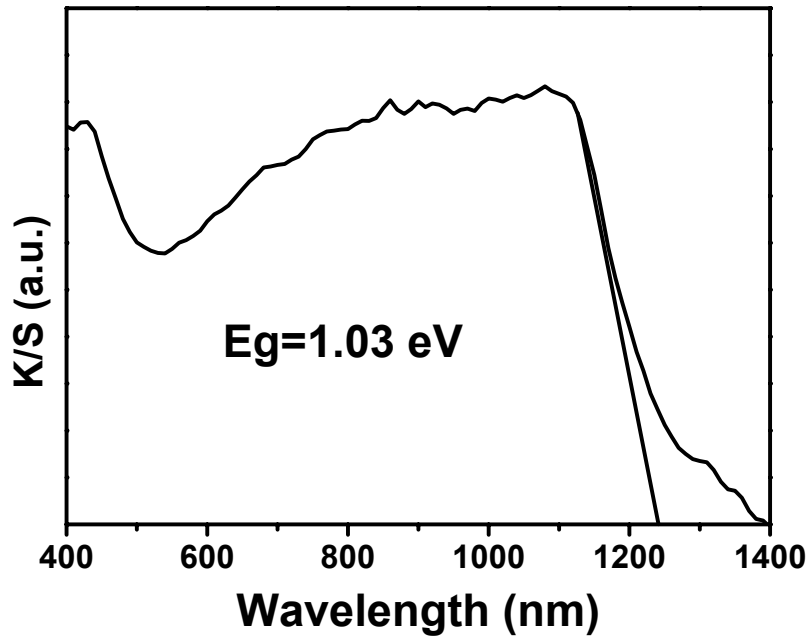

**Figure S5.** The band gap of selenized CZTSSe thin film was calculated by extrapolating the Kubelka-Munk function to  $K/S=0$ .
